# Supplementary material
Source: PubMed Central journal article supplement (PMC2584782)

Supplementary Information:

- I.) **Distance Tree of RGH Proteins From The Five Species.** Sequences were aligned using ClustalX and the Neighbor-Joining tree was bootstrapped for 2000 trials. The resulting distance tree were displayed and outputted with TreeView (Page 1996). Scale is for the rate of nucleotide substitution per site.

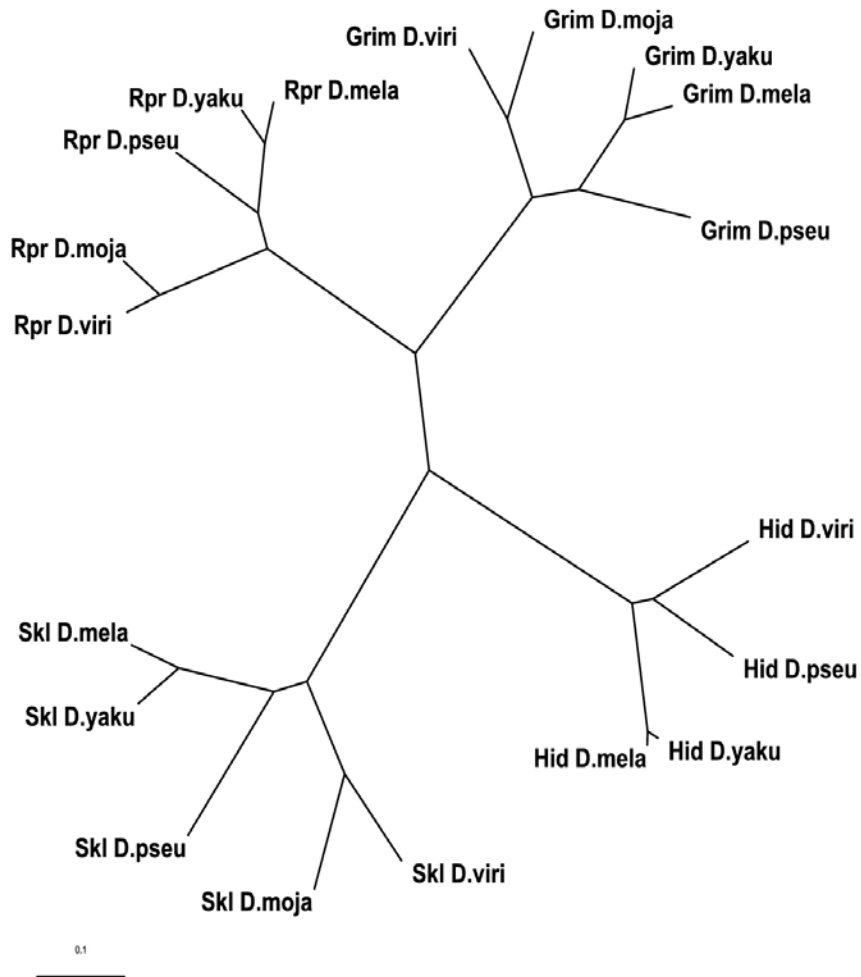

Supplement: NIHMS58028-supplement-supplement_1.pdf [file NIHMS58028-supplement-supplement_1.pdf]
